# Supplementary material for: Characterization of a Family of Scorpion Toxins Modulating Ca2+-Activated Cl− Current in Vascular Myocytes
Source: MDPI journal article supplement (doi:10.3390/toxins14110780), 2022-11-10
Supplement: s1 [file s1]

| gene abbreviation | amplified sequence                                                                                                                                                                 | length |                 | efficiency % | R <sup>2</sup> |
|-------------------|------------------------------------------------------------------------------------------------------------------------------------------------------------------------------------|--------|-----------------|--------------|----------------|
| Ano1 (TMEM16A)    | ACAACATCCACCATGAGAACCCTTCTCCTGTGGATCTGCTGGCTGATGTCCTTTGGGGATATCAGGGATCACCCAGTCCACAAAGTCACTCA<br>TGAACATCACCAAGTTCTGGGAAGACAATGACGAATGCCAGCCGGCGGCCAGGA                             | 114    | intron_spanning | 100          | 0.9986         |
| Ano2              | GGCAAGTTCTCAGTCATCATCAATGCTTTTGTCAATTGCTGTACCTCCGACTTTATCCCCGCCTTGTATACCACTACTCTTATAGCCACA<br>ACGGGACGCTACATGGATTCTGTGAACCA                                                        | 119    | intron_spanning | 99           | 0.9996         |
| Ano3              | CAGGAATCAGCAATTCAGTATACCATCCCAGCCAGGCAAGATAAGCCAATCTTCTACCAAAAGTACAGCCTGATTAAAGTCCAGAGGTTG<br>ATGCTTGTACCACTTCC                                                                    | 109    | intron_spanning | 102          | 0.9998         |
| Ano4              | CCTTCGAGAATTCATACCAAAATTCCTATGTCCTTGCCCTCCTGAAGCCAGAGGCCCTTCTCCACTGAGTACAAACTTGTAAAGCATCAAGT<br>CGGATTTCAATGATGTTATTCACTAAGGCC                                                     | 120    | intron_spanning | 99           | 0.9997         |
| Ano6              | AAGTGATGAACAACGTTAACAAATTTGGGATTAAAGACTGGTCAGTTCTGGCATCTACAAAGCAGCGTTCCCTCTGCACGACTGCAAAATTC<br>AACTATAAGTCGGAAGACC                                                                | 111    | intron_spanning | 94           | 0.9993         |
| Ano7              | GCTGTGGTGATTATGTGTCTTGTATCTATCATCTGTACCGGGCCGTGATGGCTATCATCTGTGTCCAAGTCGAACACGCCCTTC                                                                                               | 84     | exonic          | 91           | 0.9916         |
| Ano8              | CGAGGACCTGTTATGTCTCTTGTGTCTCCCGGCCGCATGCCAGAGCCAGTCTCCGGATCTCGGTCCTCCATCAGATC                                                                                                      | 77     | exonic          | 103          | 0.9976         |
| Ano9              | AGTCTCTTCTTGCTGTTCACGACAAAGTTCAACAATTCGGATTCTTGTTGAGTCTATGTTGAAGTTCTGCTTGGCTCTGGACCTAGGATCTT<br>CAGGCTTCATGAGGA                                                                    | 106    | intron_spanning | 96           | 0.9994         |
| Ano10             | GGAAACAATCCCAAGTAATCATCAAGGTCCCAAGTAAGTGCCTATTTCTTCTCCAGGAGGACTTGCTCATACAAGTCTGCTGTCAACAT<br>CCGACTTCAATGC                                                                         | 103    | intron_spanning | 101          | 0.9985         |
| Best1             | TGCTGATGATTGAGAGAACCATTCTGTAGAGTCCACGGATGC AATAGTAGAGGAATATGAAGACAAGGAATTTCTCCG                                                                                                    | 78     | intron_spanning | 96           | 0.9993         |
| Clcn1             | TCCATGTTCTCTGGTGTCATGAGCAGCCATACTATTACACTGACATCTCGACAGTGGGCTGTGCCGTGGGGTGGCGTTGCTGTTTTGG<br>AACACCACTTGGAG                                                                         | 103    | intron_spanning | 98           | 0.9996         |
| Clcn2             | CAGGACGGGTGCGGGCGCGGGCTCAGCGAGCCGGGAGCTGAGTCAAGGCCAGAGCCCGAGAAGCAAGAGGAGGCAAGAGGACAGTG<br>CACCGAGATG                                                                               | 66     | exonic          | 99           | 0.9997         |
| Clcn3             | GACTTCCGAAGACGACAATTTGTTAGACGGTGACACAGCAGCTGGAACCTATTATACAATGACAAATGGAGGCAGCATTACAGCTCCACA<br>CACT                                                                                 | 95     | intron_spanning | 100          | 0.9990         |
| Clcn4             | TGGATCATCTTCAGGAACGGTGCAGGCCTGGAGCGGACTGTGTACACCAGGGCTTTATGCGATGGTGGGAGCTGCAGCCTGTCTAG<br>GTGGAGTGACTAGGATGACAGTGTCTCTGG                                                           | 118    | intron_spanning | 96           | 0.9994         |
| Clcn5             | CTTCTGTAAAAGCGCCTCAACCTTAATGAGCAAAATGCGGGCTGCCAAGTTGGTTCTTCTTGAGGCAGAAAAAGAAAACTGTGAACGA<br>AGGGAAACAAGTCATACAATGGTGGTGAATAGGCTCTTCAATAGA                                          | 107    | intron_spanning | 101          | 0.9993         |
| Clcn6             | CATGTCTGTAGGTGTCATTGGGACAGAAAAATGCTTGATAGTTGAATTCACATCTTCCGATGTGACCTGGAGCTGGAATGAGCCATTA<br>CCCCTTTGACTCGTGGAAAGACATCT                                                             | 116    | intron_spanning | 102          | 0.9992         |
| Clcn7             | CCTAAGTGACACAGCGTCTTAATCACAAATGGGTTCCCTGTGGTGGAGGATGTAGGAGACACCCAGCCAGCCAGACTCCAAGGCCAATCC<br>TGCGTTCCAGCTCATCTGTGCTCCTGAAGCACAAGGTGTTTTGTGGAGAGGTC                                | 111    | intron-spanning | 97           | 0.9974         |
| Clcnka            | TCGGAATCTGGTCTTGTAGATGGAGGTGATGGTCTCCTGTTCCTACTGTTGAAGACCCCTAGGAGACGGAACATGAAGG                                                                                                    | 77     | intron_spanning | 99           | 0.9987         |
| Clcnkb            | CTCCCTGTACAGCCCACTTATGTGCTCTGACCACACGTCCCAATAGCAAGTTCTATGGCATAGCTGATCAGAGCCATGAGCACCCCGAGAG<br>CCACCAGGAAGTACCAGTCTTCAACCCACACGGAACAGCCGCTCTTTCAGCCACTCTAGGCTCCCGTGGATGTTCTGCGGATT | 172    | intron_spanning | 97           | 0.9994         |
| Cftr              | GATGTTGGCTATTACTGGATCTACTGGAGCAGGAAGACATCACTCCTGATGCTGATACTGGGAGAACCTGGAAGGCTCAGAGGGAATTATT<br>AAGCACAGTGAAG                                                                       | 105    | intron_spanning | 99           | 0.9998         |
| Gadd45a           | CTTAAGGCAGGATCCTTCCATTGTGATGAATGTGGGTCGTCACCAGCACACAGTGAAGTCCGGGGTCTGCGCAGCGCCCCCGCTCT<br>CAGCGGGGGCTCTTGTCTTCTCCAGTAGCAACAGCTCTGCCCAGCCGACC                                       | 107    | intron_spanning | 100          | 0.9998         |
| Lrrc8a            | AAGACCATCGAGGAGATCATCAGCTTCCAGCATCTGCACCGCCTCACTGCTCTTAAGCTGTGGTACAACCAAC                                                                                                          | 72     | exonic          | 97           | 0.9997         |
| Lrrc8c            | GAACCTGGTCACTGGAAATCATGTTTCTTATATGTATATGTTACTTCTCTGAACATCTGTGGTCCCAGAATTTCTTAGTCATAAGCAGCCAC                                                                                       | 90     | intron_spanning | 91           | 0.9993         |
| Lrrc8b            | CCAAGAGTAGACACTGAAGTTCTTGCACTGGAACAGCCCGTCTGGTAGCATCTCGATGTTATTGTTGGTCACGGCGAAGTACTGCAGGT<br>TGGTCAGGTACTGG                                                                        | 104    | intron_spanning | 101          | 0.9996         |
| Lrrc8d            | TGCAGTGTAGCAGAGGATAAAAAATGAACCTGGCGGTCCTTGATGAGGGTCTGGACCACGTAGAGCTTGTAGATCAAGTCACTGTCTTCCAC                                                                                       | 90     | exonic          | 96           | 0.9997         |
| Lrrc8e            | CTGATGAGTTCTCACGAGATTCTAGGCTGGGCAGGCAGATGATCTTGTCTGTACCTGGAGGGTGCACCCGAACACCCCAATCATG<br>AGCATAGCCACAG                                                                             | 102    | intron_spanning | 97           | 0.9996         |
| Sema3g            | AGACTCAACAACCTCTCTCTCCCACCCGGCTAGGAAAAGGAGTCCAGGACGCCTGATTACCTCTTAGAGAAAATCTCTACCACTACAGG<br>AA                                                                                    | 92     | exonic          | 99           | 0.9995         |
| Slc12a1           | TGGATGGGTGAAAGGTGTGCTGGTGGAGGTGCATGCTGAACATCTGGGGAGTCAATGCTTTCATTCGCCCTCTCTGGATTGTAGAGAAG<br>CGGGAATTGGTCTTGGAGaTCCCTATAATTCTCTTCCACCATGGTAACCTCTATCAC                             | 117    | intron_spanning | 100          | 0.9999         |
| Slc12a2           | TGTAAGATCCGAGTATTCTATTGGTGGAAAGATAAACAGAAATAGACCATGACCGGAGAGCGATGGCTACTTTACTCAGTAAATTCGAAATAGA<br>CTTCTCCGATATCATGGT                                                               | 110    | intron_spanning | 94           | 0.9984         |
| Slc12a4           | GCCTGACATGCTGTGTGTGCCCGATGGGTAAAAGATGGCAGCTGGTGGAGCAATGAGGTACGCAAGATCTCAATGGCTCTCTAGGAT                                                                                            | 87     | intron_spanning | 99           | 0.9999         |
| Slc12a5           | CCGAGCCCGGCGCGCGCGCAGCCACCATGCTCAACAACCTGACGGACTGCGAGGAGCAGGCGATGGGGGAGGCAACCCGGGTGACGGC<br>AATCCCAGGAGAGCAGCCCTTCTATCAACAGCACGGACAGGAGAGGAGAGATGATGATGGCAGGAACATGG                | 113    | intron_spanning | 96           | 0.9998         |
| Slc12a6           | CATGCTATTACCATTCCTACTGAAACAGCACAAAGTTTGGCGAAAATGCAGCATACGGGATCTTACAGTAGGCCCAACTAGAAGACAACAGT<br>ATCCAGATGA                                                                         | 101    | intron_spanning | 96           | 0.9999         |
| Slc12a7           | GTGTTCTGTGCTGAATCAGCTGGGCCCTCTCTCTCCCGCTCATTTTGACAACCTGCATCTGTTTACAGCATCTGTGACCTCTGCTCCAT<br>CATTAGCGTCTTCTCATAGGTGA                                                               | 112    | intron_spanning | 99           | 0.9992         |
| Slc26a9           | TTGTTACCTTCCACACTCTCATCCTTGACATGAGTGGAGTCAGCTTTGTGGACCTGATGGGCATCAAGCTCTAGCCAAGCTAAGCTCC<br>ACCTATGAGAAGA                                                                          | 103    | intron_spanning | 95           | 0.9994         |
| Tmem206           | GAGCTGGTCCAAGTTCAAGGTCCAGGTGTTGTGCCAGGTGTGGACATGAGTCTGCATCCAG                                                                                                                      | 62     | intron_spanning | 99           | 0.9996         |
| Ttyh1             | CCTTGACCTCACAGAGAAGACGCCTGCCCTCGCTCCCTAGTACTGAGATTAAAGCATGTATCACCATATCACCAGC                                                                                                       | 76     | exonic          | 101          | 0.9990         |
| Ttyh2             | GAGAACGTGCCACTCATCGGGAGAGGTTCCCTCCGCCACGTA CTCTCCAGCATGAGAGCCACCTCATGTCTCCGTGGCGGATGAA<br>CACCTGAGACACTAC                                                                          | 102    | Intron-spanning | 96           | 0.9995         |
| Ttyh3             | CACCTCTGCTTTCGCAATGTCCGGCGCCTGCTTCCCTTATCCACCCAGCTTACTTGGCTCTTCTCTGTCT                                                                                                             | 69     | exonic          | 99           | 0.9999         |
| Hprt1             | GTAGATGGCCACAGGACTAGAAGCTCTGCTAGTCTTTACTGGCCACATCAACAGGACTCTTGATGATTCAACTTGCCG                                                                                                     | 79     | Exonic          | 98           | 0.9989         |
| Sdha              | CCTGAGCATTGCAGAATCTTGCAGGCCCTGGAGATAAAGTTCTCCGATTAAAGCAAAATGCTGGAGAAGATCGGGTTATGAATCTTGACAAG<br>TTGAGATTGCTGATGGAAGTGAAGAATCATCAGAGCTGCGCTAAGCATGCAGAAG                            | 118    | Intron-spanning | 97           | 0.998          |
| Ywhaz             | GTTGGAAGCCCGGTTAAATTTTCCCTCTCTCTCCGCTTCTGCTCTCTCTTGGGTATCCGATGTCCACAAATGTCAAGTTGCTCTCTCA<br>GTAACTGCA                                                                              | 99     | Intron-spanning | 92           | 0.9998         |
